# Supplementary material for: Effects of unstable training on muscle activation: a systematic review and meta-analysis of electromyographic studies
Source: PeerJ. 2025 Jul 24;13:e19751. doi: 10.7717/peerj.19751 (PMC12296569; doi:10.7717/peerj.19751)
Supplement: Supplemental Information 2 [file peerj-13-19751-s002.xlsx]

## Sheet: Core
Author	mean	sd	n	mean1	sd1	n	Muscle
Anderson.2013 a	70.25	52.72	15	27.37	16.77	15	RA
Anderson.2013 b	29.9	23	15	27.37	16.77	15	RA
Anderson.2013 c	100.29	88.14	15	27.37	16.77	15	RA
Czaprowski, D.2014 a	2.06	1.2	33	2.16	1.6	33	RA
Czaprowski, D.2014 b	3.53	2.6	33	2.16	1.6	33	RA
Harris, S.2017 a	121.09	118.98	25	74.94	30.26	25	RA
Harris, S.2017 b	93.9	36.7	25	67.47	25.26	25	RA
Harris, S.2017 c	67.41	21.27	25	63.43	18.94	25	RA
Harris, S.2017 d	60.83	15.6	25	57.73	15.77	25	RA
Lawrence, M. A.2015	113.2	46.2	15	100.6	37	15	RA
Lee 2023	9.67	10.06	26	10.07	12.45	26	RA
Liu 2013 a	36.78	9.31	15	30.78	7.97	15	RA
Liu 2013 b	40.44	12.85	15	35.89	11.52	15	RA
Norwood, J. T.2007 a	6.47	2.92	15	7.9	8.15	15	RA
Norwood, J. T.2007 b	5.7	3.7	15	7.9	8.15	15	RA
Norwood, J. T.2007 c	9.19	4.06	15	7.9	8.15	15	RA
Palma 2021 a	45.1	29.7	12	27.9	16.9	12	RA
Palma 2021 b	37.1	20	12	27.9	16.9	12	RA
Palma 2021 c	112.2	38	12	27.9	16.9	12	RA
Saeterbakken 2013 a	0.04	0.02	15	0.03	0.01	15	RA
Saeterbakken 2013 b	0.03	0.01	15	0.03	0.01	15	RA
Saeterbakken 2013 c	0.03	0.01	15	0.03	0.01	15	RA
Anderson S. 2013	4.9	3.4	33	4.9	3.3	33	IO
Czaprowski, D. 2014	98	62.47	15	38.56	23.64	15	IO
Harris, S. 2017 a	66.79	24.12	25	54.63	23.25	25	IO
Harris, S. 2017 b	81.04	60.14	25	52.8	26.74	25	IO
Harris, S. 2017 c	40.56	24.74	25	37.44	20.39	25	IO
Harris, S. 2017 d	41.44	28.01	25	33.11	12.09	25	IO
Lee 2023	33.42	13.95	26	28.44	17.71	26	IO
Saeterbakken 2013 a	0.04	0.02	15	0.03	0.01	15	IO
Saeterbakken 2013 b	0.03	0.01	15	0.03	0.01	15	IO
Saeterbakken 2013 c	0.03	0.01	15	0.03	0.01	15	IO
Vera-Garcia, F. J. 2000 a	19.27	7.9	8	11.53	7.5	8	IO
Vera-Garcia, F. J. 2000 a1	16.14	10	8	11.53	7.5	8	IO
Vera-Garcia, F. J. 2000 b	19.79	7.4	8	10.98	8.4	8	IO
Vera-Garcia, F. J. 2000 b1	16.08	10.2	8	10.98	8.4	8	IO
Czaprowski, D. 2014	4.9	3.4	33	4.9	3.3	33	EO
Harris, S. 2017 a	66.79	24.12	25	54.63	23.25	25	EO
Harris, S. 2017 b	81.04	60.14	25	52.8	26.74	25	EO
Harris, S. 2017 c	40.56	24.74	25	37.44	20.39	25	EO
Harris, S. 2017 d	41.44	28.01	25	33.11	12.09	25	EO
Lawrence, M. A.2015	102.8	306.5	15	22.5	10.8	15	EO
Palma 2021 a	50.1	25.3	12	43	20.1	12	EO
Palma 2021 b	45.9	19.3	12	43	20.1	12	EO
Saeterbakken 2013 a	0.07	0.03	15	0.06	0.02	15	EO
Saeterbakken 2013 b	0.06	0.03	15	0.06	0.02	15	EO
Saeterbakken 2013 c	0.07	0.02	15	0.06	0.02	15	EO
Vera-Garcia, F. J. 2000 a	21.21	12.5	8	4.73	4.3	8	EO
Vera-Garcia, F. J. 2000 a1	19.75	10	8	4.62	2.2	8	EO
Vera-Garcia, F. J. 2000 b	7.37	5.92	8	4.73	4.3	8	EO
Vera-Garcia, F. J. 2000 b1	9.12	7	8	4.62	2.2	8	EO
Anderson.2013	23.63	21.14	15	11.8	5.94	15	ES
Calatayud, J. 2014	3.21	0.24	29	2.03	0.14	29	ES
Harris, S.2017 a	40.67	16.45	25	41.28	23.33	25	ES
Harris, S.2017 b	54.52	21.96	25	41.1	15.96	25	ES
Kohler, J. M.2010	25	28	30	31	21	30	ES
Lawrence, M. A.2015	157.7	82.6	15	144.2	74.2	15	ES
Luk, J. 2021 a	6.2	2.4	43	4.2	1.5	43	ES
Luk, J. 2021 b	9.3	4.7	43	4.2	1.5	43	ES
Norwood, J. T. 2007 a	11.64	12.63	15	9.7	9.83	15	ES
Norwood, J. T. 2007 b	7.23	4.33	15	9.7	9.83	15	ES
Norwood, J. T. 2007 c	23.24	27.63	15	9.7	9.83	15	ES
Saeterbakken 2013 a	0.29	0.13	15	0.31	0.12	15	ES
Saeterbakken 2013 b	0.25	0.1	15	0.31	0.12	15	ES
Saeterbakken 2013 c	0.28	0.08	15	0.31	0.12	15	ES
Snarr, R. L. 2016 a	10.66	9.98	20	7.83	6.71	20	ES
Snarr, R. L. 2016 b	16.43	15.23	20	7.83	6.71	20	ES
Snarr, R. L. 2016 c	14.14	6.79	20	7.83	6.71	20	ES
Snarr, R. L. 2016 d	13.03	6.44	20	7.83	6.71	20	ES

## Sheet: Upper limb
Author	mean	sd	n	mean1	sd1	n	Muscle
Lawrence, M. A. 2010 a	124	75	15	85	54	15	BB
Lawrence, M. A. 2010 b	134	89	15	92	54	15	BB
Lima, C. 2018	0.98	0.55	19	0.69	0.42	19	BB
Walker 2017 a	0.55	0.25	10	0.3	0.17	10	BB
Walker 2017 b	0.39	0.23	10	0.12	0.11	10	BB
Williams 2020 a	303	162	12	291	185	12	BB
Williams 2020 b	512	262	12	291	185	12	BB
Kohler, J. M. 2010 a	433	265	30	450	262	30	TM
Kohler, J. M. 2010 b	441	280	30	450	262	30	TM
Kohler, J. M. 2010 c	429	266	30	450	262	30	TM
Lawrence, M. A. 2010 a	68	78	15	63	66	15	TM
Lawrence, M. A. 2010 b	74	77	15	52	61	15	TM
Park 2013 a	41.51	16.46	14	31.08	15.48	14	TM
Park 2013 a1	49.03	18.58	14	39.3	11.76	14	TM
Park 2013 b	35.55	18.23	14	26.23	13.24	14	TM
Park 2013 b1	57.8	20.08	14	49.25	15.93	14	TM
Pirauá, A. L. 2014 a	47.6	26.57	30	36.4	22.01	40	TM
Pirauá, A. L. 2014 b	84.88	51.36	30	73.01	55.16	40	TM
Torres 2017 a	67.58	48.73	20	73.05	58.78	20	TM
Torres 2017 b	102.88	57.62	20	61.9	46.74	20	TM
Torres 2017 c	88.33	59.66	20	50.17	31.19	20	TM
Tucker 2010 a	47.3	36.18	30	36.86	35.66	30	TM
Tucker 2010 a1	61.64	47.44	30	44.69	30.24	30	TM
Tucker 2010 b	33.76	26.45	30	25.88	13.76	30	TM
Tucker 2010 b1	19.49	7.73	30	17.99	7.31	30	TM
Tucker 2010 c	26.08	12.35	30	26.42	12	30	TM
Tucker 2010 c1	27.49	11.15	30	26.98	13.05	30	TM
Walker 2017 a	0.63	0.48	10	0.45	0.45	10	TM
Walker 2017 a1	5.48	8.17	10	4.32	7.04	10	TM
Walker 2017 b	0.27	0.25	10	0.31	0.23	10	TM
Walker 2017 b1	4.87	7.56	10	4.13	7.58	10	TM
Williams 2020 a	176	117	12	171	131	12	TM
Williams 2020 b	211	129	12	171	131	12	TM
Dunnick 2015 a	59.3	19.64	20	51.69	20.51	20	DM
Dunnick 2015 a1	78.53	22.92	20	76.53	35.99	20	DM
Dunnick 2015 b	93	17.67	20	91.32	39.55	20	DM
Dunnick 2015 b1	124.23	27.3	20	123.77	52.21	20	DM
Kohler, J. M. 2010 a	507	213	30	495	199	30	DM
Kohler, J. M. 2010 b	500	225	30	495	199	30	DM
Kohler, J. M. 2010 c	472	162	30	495	199	30	DM
Lawrence, M. A. 2010 a	264	121	15	340	158	15	DM
Lawrence, M. A. 2010 b	274	129	15	336	165	15	DM
Lima, C. 2018	0.45	0.25	19	0.51	0.31	19	DM
Torres 2017	83.75	40.63	20	127.81	67.16	20	DM
Uribe, B. P. 2010 a	0.85	0.41	16	0.9	0.35	16	DM
Uribe, B. P. 2010 a1	1.04	0.6	16	0.96	0.61	16	DM
Uribe, B. P. 2010 b	1.11	0.59	16	1.09	0.58	16	DM
Uribe, B. P. 2010 b1	1.11	0.7	16	1.11	0.71	16	DM
Williams 2020 a	929	498	12	915	497	12	DM
Williams 2020 b	1043	533	12	915	497	12	DM
Park 2013 a	18.95	8.93	14	18.4	6.72	14	SA
Park 2013 a1	29.13	9.26	14	27.62	12.39	14	SA
Park 2013 b	41.13	19.47	14	40.28	19.68	14	SA
Park 2013 b1	62.9	19.85	14	50.26	17.06	14	SA
Torres 2017	103.02	53.55	20	74	37.52	20	SA
Walker 2017 a	0.64	0.67	10	0.41	0.33	10	SA
Walker 2017 b	0.67	0.61	10	0.38	0.32	10	SA
Williams 2020 a	351	305	12	312	282	12	SA
Williams 2020 b	411	310	12	312	282	12	SA
Dunnick 2015 a	54.01	23.28	20	48.2	22.8	20	TB
Dunnick 2015 a1	72.84	27.56	20	66.35	29.36	20	TB
Dunnick 2015 b	96.87	45.68	20	85.61	51.05	20	TB
Dunnick 2015 b1	165.18	84.16	20	154.53	96.05	20	TB
Lima, C. 2018	0.49	0.21	19	0.47	0.24	19	TB
Park 2013 a	60.24	13.8	14	53.58	17.37	14	TB
Park 2013 b	75.43	11.31	14	72.29	14.07	14	TB
Torres 2017	1367.9	457.35	20	1186.85	429.36	20	TB
Walker 2017 a	1.1	0.46	10	1	0.55	10	TB
Walker 2017 b	1.7	0.94	10	1.12	0.64	10	TB
Williams 2020 a	275	203	12	259	206	12	TB
Williams 2020 b	297	167	12	259	206	12	TB
Dunnick 2015 a	59.53	17.91	20	54.73	13.97	20	PM
Dunnick 2015 a1	80.07	20.7	20	78.06	17.17	20	PM
Dunnick 2015 b	102.24	23.03	20	95.87	19.41	20	PM
Dunnick 2015 b1	132.62	28.22	20	129.94	24.08	20	PM
Lawrence, M. A. 2010 a	159	100	15	190	95	15	PM
Lawrence, M. A. 2010 b	177	114	15	230	137	15	PM
Palma 2021 a	55	27.9	12	56.6	34.2	12	PM
Palma 2021 b	59.3	34.8	12	56.6	34.2	12	PM
Palma 2021 c	53.6	26.6	12	56.6	34.2	12	PM
Park 2013 a	54.03	19.47	14	46.83	14.03	14	PM
Park 2013 b	66.09	17.6	14	61.23	17.17	14	PM
Torres 2017	153.51	94.48	20	149.6	101.4	20	PM
Uribe, B. P. 2010 a	1.74	1.81	16	1.64	1.68	16	PM
Uribe, B. P. 2010 a1	1.38	1.17	16	1.65	1.93	16	PM
Uribe, B. P. 2010 b	0.72	0.56	16	0.76	0.52	16	PM
Uribe, B. P. 2010 b1	0.55	0.39	16	0.53	0.32	16	PM
Walker 2017 a	3.75	3.28	10	3.37	2.78	10	PM
Walker 2017 b	3.59	3.59	10	3.72	4.31	10	PM
Williams 2020 a	92	35	12	86	29	12	PM
Williams 2020 b	118	44	12	86	29	12	PM
Dunnick 2015 a	62.26	23.14	20	59.39	19.98	20	LD
Dunnick 2015 a1	76.38	25.13	20	76.3	26.2	20	LD
Dunnick 2015 b	82.01	21.98	20	81	26.05	20	LD
Dunnick 2015 b1	114.77	26	20	118.75	37.6	20	LD
Lawrence, M. A. 2010 a	39	21	15	43	26	15	LD
Lawrence, M. A. 2010 b	40	25	15	45	26	15	LD
Walker 2017 a	1.61	1.28	10	1.33	1.46	10	LD
Walker 2017 b	1.23	0.77	10	1.13	0.98	10	LD
Williams 2020 a	60	36	12	54	36	12	LD
Williams 2020 b	75	41	12	54	36	12	LD

## Sheet: Lower limb
Author	mean	sd	n	mean1	sd1	n	Muscle
Anderson 2013a	16.78	22.58	15	9.03	15.97	15	SM
Anderson 2013b	16.12	17.38	15	9.03	15.97	15	SM
Anderson 2013c	29.23	34.73	15	9.03	15.97	15	SM
Lawrence 2015a	107.9	55.6	15	87.3	33	15	SM
Lawrence 2015b	60.1	29.3	15	50.7	23.3	15	SM
Norwood 2007a	9.06	11.09	15	3.15	1.24	15	SM
Norwood 2007b	9.54	4.76	15	3.15	1.24	15	SM
Norwood 2007c	19.78	11.27	15	3.15	1.24	15	SM
Saeterbakken 2013a	0.18	0.06	15	0.16	0.06	15	SM
Saeterbakken 2013b	0.2	0.09	15	0.16	0.06	15	SM
Saeterbakken 2013c	0.18	0.07	15	0.16	0.06	15	SM
Krause 2018	24.1	15.1	30	15.3	11.4	30	GM
López-de-Celis 2024a	28.5	15.8	28	20.8	12.6	28	GM
López-de-Celis 2024b	29.7	13.3	28	26.5	13.1	28	GM
López-de-Celis 2024c	24.5	9.4	28	25.2	9.7	28	GM
López-de-Celis 2024d	27	1.6	28	26.4	13	28	GM
Bouillon 2020a	33	27	20	32	27	20	RF
Bouillon 2020b	22	14	20	32	27	20	RF
Bouillon 2020c	38	27	20	34	31	20	RF
Bouillon 2020d	24	16	20	34	31	20	RF
Krause 2018	24.5	22	30	22.1	22.2	30	RF
Lawrence 2015a	240	168.2	15	207.3	126.9	15	RF
Lawrence 2015b	203.7	167.1	15	179.7	95.2	15	RF
Saeterbakken 2013a	0.35	0.1	15	0.41	0.11	15	RF
Saeterbakken 2013b	0.34	0.09	15	0.41	0.11	15	RF
Saeterbakken 2013c	0.31	0.1	15	0.41	0.11	15	RF
GÜNdoĞAn 2023a	101.03	34.01	14	99.72	33.23	14	VL
GÜNdoĞAn 2023b	101.52	34.33	14	99.72	33.23	14	VL
López-de-Celis 2024a	30.4	37.6	28	19	26.7	28	VL
López-de-Celis 2024b	33.7	39.9	28	31.1	39.3	28	VL
López-de-Celis 2024c	44.4	21.5	28	45.9	20.9	28	VL
López-de-Celis 2024d	45.4	25.6	28	46.3	23.1	28	VL
Saeterbakken 2013a	0.43	0.11	15	0.46	0.13	15	VL
Saeterbakken 2013b	0.44	0.12	15	0.46	0.13	15	VL
Saeterbakken 2013c	0.4	0.1	15	0.46	0.13	15	VL
Bouillon 2020a	44	15	20	38	11	20	VM
Bouillon 2020b	36	12	20	38	11	20	VM
Bouillon 2020c	38	27	20	34	31	20	VM
Bouillon 2020d	24	16	20	34	31	20	VM
GÜNdoĞAn 2023a	88.7	21.92	14	84.57	19.04	14	VM
GÜNdoĞAn 2023b	89.16	16.74	14	84.57	19.04	14	VM
López-de-Celis 2024a	14.2	13	28	7	5.6	28	VM
López-de-Celis 2024b	21.5	16.9	28	15.5	10.7	28	VM
López-de-Celis 2024c	51.8	29.6	28	54.3	29.3	28	VM
López-de-Celis 2024d	45.4	18.1	28	47.1	20.8	28	VM
Saeterbakken 2013a	0.59	0.29	15	0.67	0.51	15	VM
Saeterbakken 2013b	0.56	0.26	15	0.67	0.51	15	VM
Saeterbakken 2013c	0.54	0.25	15	0.67	0.51	15	VM
Bouillon 2020a	14	7	20	12	8	20	BF
Bouillon 2020b	12	5	20	12	8	20	BF
Bouillon 2020c	16	10	20	12	6	20	BF
Bouillon 2020d	11	4	20	12	6	20	BF
Lawrence 2015a	12.4	9.9	15	12.9	10.1	15	BF
Lawrence 2015b	7.6	4.9	15	8.2	6.3	15	BF
Saeterbakken 2013a	0.11	0.06	15	0.1	0.04	15	BF
Saeterbakken 2013b	0.11	0.05	15	0.1	0.04	15	BF
Saeterbakken 2013c	0.13	0.06	15	0.1	0.04	15	BF
